# Supplementary material for: Laser-ultrasonic delivery of agents into articular cartilage
Source: PubMed Central journal article supplement (PMC5479804; doi:10.1038/s41598-017-04293-5), 2017-06-21
Supplement: 41598_2017_4293_MOESM1_ESM.pdf [file 41598_2017_4293_MOESM1_ESM.pdf]

## Laser-ultrasonic delivery of agents into articular cartilage

Heikki J. Nieminen, Gonçalo Barreto, Mikko A. Finnilä, Alejandro García-Pérez, Ari Salmi, Sanjeev Ranjan, Kari K. Eklund, Kenneth P.H. Pritzker, Simo Saarakkala, Edward Hægström

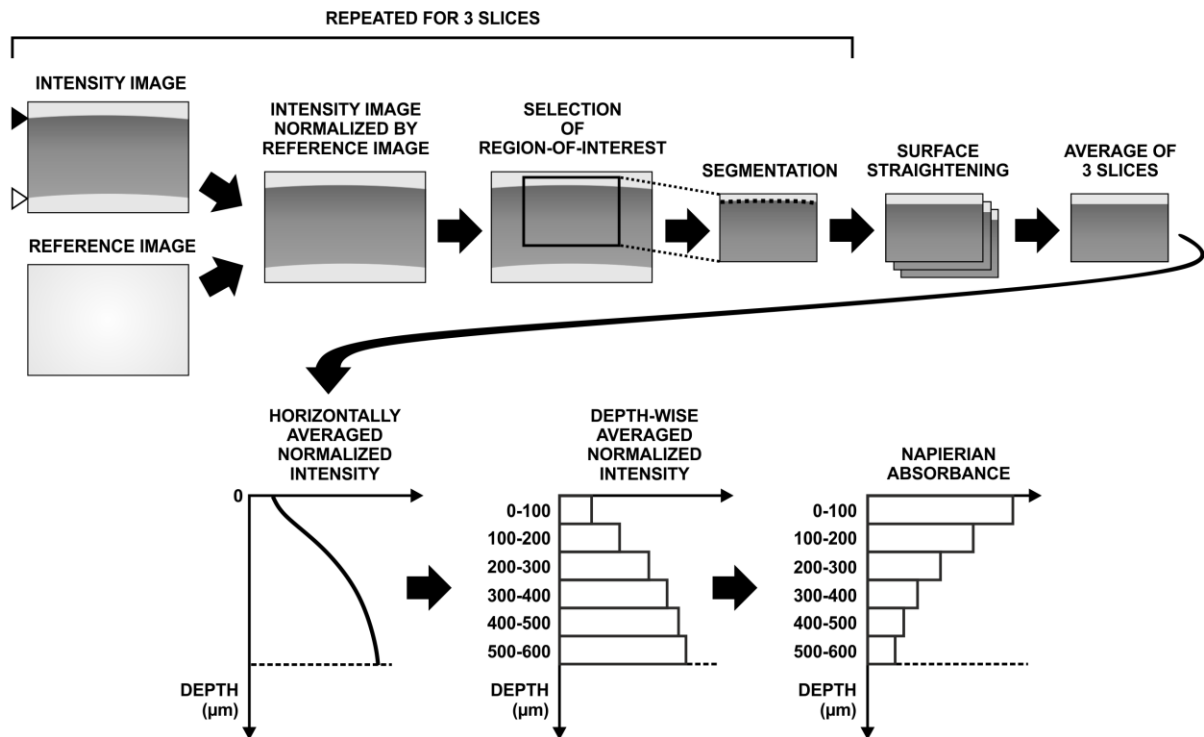

**Figure A1:** The delivery of methylene blue (MB) was detected from light microscope images acquired in through transmission mode (light wavelength  $\lambda = 657 \text{ nm}$ ). Napierian optical absorbance image was calculated based on optical intensity images acquired from 3 articular cartilage sections per sample (with microscope glass) and a reference images (microscope glass only). Depth-wise absorbance was determined at depths 0-100, 100-200, 200-300  $\mu\text{m}$  etc. Absorbance is linearly associated with concentration of light-absorbing medium and is, therefore, used as an indicator for MB content in the tissue.

16 **TABLE A1.** Primer pairs used for droplet digital polymerase chain reactions.

| <b>Gene</b>   | <b>Protein name</b>                      | <b>Primer Sequence</b>                         |
|---------------|------------------------------------------|------------------------------------------------|
| <i>ACAN</i>   | Aggrecan                                 | Forward: 5' - CGA TAC CCC ATC TCC AAG GC - 3'  |
|               |                                          | Reverse 3' - AGT GAT ATT TCG GGG CAG GG - 5'   |
| <i>COL2A1</i> | Collagen, type II, alpha 1               | Forward: 5' - ACT GCC AGT GGG CAA CCA - 3'     |
|               |                                          | Reverse 3' - GTC ACC ACG ATC ACC TCT GG - 5'   |
| <i>MMP1</i>   | Matrix metalloproteinase 1 (MMP-1)       | Forward: 5' - AAA TCC CAC TCA GCC AGT CG - 3'  |
|               |                                          | Reverse 3' - CCC TGT CGG CAA CCT CAT AA - 5'   |
| <i>MMP3</i>   | Matrix metalloproteinase 3 (MMP-1)       | Forward: 5' - CAC TCA ACC GAA CGT GAA GC - 3'  |
|               |                                          | Reverse 3' - GCT GAC TGC ATC GAA GGA CA - 5'   |
| <i>MMP9</i>   | Matrix metalloproteinase 9 (MMP-9)       | Forward: 5' - GAG ATG CCC ACT TCG ACG AT - 3'  |
|               |                                          | Reverse 3' - GAG CGA CCC TCA AAG GTG AA - 5'   |
| <i>MMP13</i>  | Matrix metalloproteinase 13 (MMP-13)     | Forward: 5' - GTT GCT GCC CAT GAG TTT GG - 3'  |
|               |                                          | Reverse 3' - TGT CTG GCG TTT TGG GAT GT - 5'   |
| <i>TGFB</i>   | Transforming Growth Factor Beta          | Forward: 5' - AAT AGA GGG CTT TCG CCT CAG - 3' |
|               |                                          | Reverse 3' - AGC AGT AGT TGG TGT CCA GG - 5'   |
| <i>TIMP3</i>  | Tissue Inhibitor Of Metalloproteinases 3 | Forward: 5' - GGC CGA GTC TAT GAT GGC AA - 3'  |
|               |                                          | Reverse 3' - GTT TGG ACT GGT AGC CAG GG - 5'   |
| <i>TNF</i>    | Tumor necrosis factor                    | Forward: 5' - GAA GAG CAG TCC CCA GGT G - 3'   |
|               |                                          | Reverse 3' - GGG CTA CCG GCT TGT TAC TT - 5'   |

17

18
